# Supplementary material for: Vitexicarpin Induces Apoptosis and Inhibits Metastatic Properties via the AKT-PRAS40 Pathway in Human Osteosarcoma
Source: MDPI journal article supplement (doi:10.3390/ijms25073582), 2024-03-22

## Supplementary Figure Legend

- **Supplementary Figure S1.** Effects of Vitex on STAT3 in the human osteosarcoma cells. Western blotting of phospho-STAT3 (p-STAT3) and  $\beta$ -actin levels. The amount of  $\beta$ -actin was detected as a loading control in the same sample.

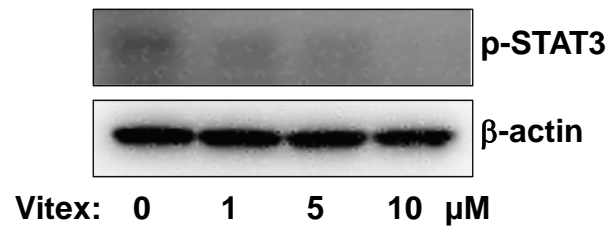

Supplement: s1 [file s1]
